# Supplementary material for: De Novo Evolutionary Emergence of a Symmetrical Protein Is Shaped by Folding Constraints
Source: PubMed Central journal article supplement (PMC4735018; doi:10.1016/j.cell.2015.12.024), 2016-01-28
Supplement: mmc2.pdf [file mmc2.pdf]

C. watsonii FG-GAP propeller motifs

Extended motifs

|         |                                           |                                      |
|---------|-------------------------------------------|--------------------------------------|
| >Q4BZF5 |                                           |                                      |
| 20      | SGISVSGIGDFNGDNISDLVIGSHQADPNGTS-SGQAHVV  | FG----- 59                           |
| >Q4BYZ3 |                                           |                                      |
| 306     | SGRSVSSAGDVNGDGFSDILIGTYHADPNGNSRAGESYVV  | FG----- 347                          |
| >Q4BY77 |                                           |                                      |
| 2       | -----SGAGDVNGDGFDDLIIGARSADPNGIGQAGESYVV  | FGKAGVFSPSFDLSSLNGSNGFVLNGIDSVDF 68  |
| 69      | SGVSVSGAGDVNGDGFDDLIIGANGADPNGNEQAGESYVV  | FG----- 110                          |
| >Q4C0A4 |                                           |                                      |
| 16      | ---SMSGAGDINGDGFDDILIGASGADPNGNRSAGESYVI  | FGSASGFSGSLDLSSLDGSNGFVLNGIDEFDG 84  |
| 85      | SGSSVSGAGDINGDGFDDIIIGAI FADPNGNESAGESYVI | FGS----- 127                         |
| >Q4C0A5 |                                           |                                      |
| 2       | -----SGAGDINGDGFDDIIIGARTADPNGNERAGESYVV  | FGAVGGFSGSLDLSSLDGNGFVINGIDEYDF 68   |
| 69      | SGESVSGAGDINGDGFDDILIGAANA-PNGIYDAGESYVV  | FGSASGFSASLDLSSLDGSNGFVINGIDEFDF 139 |
| 140     | SGESVSGAGDINGDGFDDILIGASSADPNGNYDAGESYVV  | FGAASGFSASLELSSLDGSNGFVLNGIDEDDY 211 |
| 212     | SGSSVSGAGDINGDGFDDILIGASSADPNGNERAGDSYVV  | FGSASGFSASLELSSLDGSNGFVLNGIDEDDF 283 |
| 284     | SGNSVSGAGDINGDGFDDIIIGALGASPNGNRSAGESYVV  | FGAVGGFTASLELSSLDGSNGFVLNGIDQGDN 355 |
| 356     | LGVSVSGAGDINGDGFDDIIIGALGASPNGNRLAGESYVI  | FGS----- 398                         |
| >Q4BWI7 |                                           |                                      |
| 75      | FGRSVSNAGDVNGDGIDDLIIIGAEGADPNGNSYAGETYVV | FGSES-FGDTLNLSSLNGSNGFVINGIDARDY 145 |
| 146     | SGRSVSNAGDINGDGIDDIIIGAF LADRNGNSLLGQTYVV | FGSES-FDSTLNLSSLDGSNGFVISGIDARDY 216 |
| 217     | SGRSVSNAGDVNGDGIDDFIIGAYGAEPNGNRFAGETYVI  | FGSES-FGNTLNLSSLDGNGFVINGIDEFDN 287  |
| 288     | SGFSVSNAGDINGDGFDDLIIGAF LAQPNGNIDAGETYVV | FGSSS-FEDTLNLSSLDGSNGFVINGIDEFDN 358 |
| 359     | SGFSVSNAGDINGDGFDDLIIGAFFADPNGNEDAGETYVI  | FGSES-FGSTLNLSSLNGNGFVINGIDAGDN 429  |
| 430     | SGFSVSNAGDVNGDGIDDLIIIGADPAEANGNSYAGQTYVI | FGGQNNNSNSL-LS----- 482              |

Frankia sp. strain EAN1pec, WD40 propeller motifs

>A8LD20  
---SLS----GSPLRGHTDS----VRSVAFSPDGRTLASPSQDRTV-----RLWD  
>A8L0Z3  
VTSSTNSRRTLGAFLAGHTST----VRAVAFSPDGRILASASDDEPV-----RLWD  
VTDPGDARPLDASLTGHSGW----VHSVAFSPDGHTLASAGDDHTV-----RLWN  
VTDPANAHPLGAPLTGHTST----VWAVAFSPDGRILASAGNDET-----TLWD  
VADPAQARPLDVISETR-----AVRSVAFSPDGRILASAGDDGTA-----SLWN  
VADPTNPRPLGTPLAGHTNT----VWVAFSPNGHTLASAGDDHTV-----RLWN  
VTDPANAHPLGAPLTGHTST----VRSVAFSSDSRTLASGSDDHTV-----RLWD  
VIDPANAHPRGASLTGHSSW----VRSVAFAPDGRTLASGSDDHTM-----RLWD  
>A8L0X3  
---SLS----GSPLRDHTDS----VRSVAFSRDGRTLASASQDGTA-----RLWD  
IAERTSQP-LTGRIA-----VWSVAFSPDKHTLASANGDSTV-----QLWD  
VAEGTLPH-PVASLPGHSDA----VGSVAFSPDGRTLASASDDHTV-----RLWD  
VATGTT----THTLTGHTGP----VNSVAFSRDGRTLASASDDHTV-----RLWD  
VAEGTL----LRTLPGHTEP----VMSVAFSPDRRTLASASQDNTV-----RLWD  
VAARTAPR-LVGSLSDHHTW----VMSVAFSPDGRTLASASQDRTV-----RLWD  
VAARTT----THTLTGHTGP----VFSVAFSLDGRTLASASDDNTV-----RLWD  
>A8LFK4  
PAAQAL----GQPLTDHTDW----VASVAFSPDGHTLASSSKDTTV-----RLWD  
ITDRTRPHPLGQPLAGHTLG----VMSVAFSPDGNTLASSSRDTTI-----RLWD  
ITDRTRPHPLGQPLTGHTDA----VTSVAFFSDGRTLASSSRDTTI-----RLWD  
ITDRTRRPLGSPLSGHSDW----VTSLALTMGRTLASSSLDSTV-----RLWN  
MADRSHQPQIPLPLTGHTGG----VNSVAFSLDSRTLASSGRDTTI-----RLWD  
VTDRSTPRLGAPITGHANT----VGPLTFSQDGDTLVSGSYDDTV-----RIWD  
VTDRSHPRLLGLPLTGHTDW----IWSVALSPDGQTLASGSKDNTI-----RLWA  
>A8L1U6  
VTDRTPTPLEKTLYGH-TG---WVRSVVFSPDGRTLASGSDDDTV-----RFWD  
MSDPTDPTPLGKPLTGH-TDP---IAAVAYSPDGRTLATSSTDRTV-----RFWD  
MSDRADPTPLGKPLTRHSTDPTSVAAMAYS PDGRTLATGGLDNTL-----RLWD  
VTDRTNPTPLGPPLTGH-TKT---VAFLAYSPDGRTLATGSYDRTV-----RLWD  
VSDRTSPAPLGPPLTGHTNP----LMSLAYSPDGRTLATSASDYST-----RFWD  
VSDRTRPTPLGEPIFLGDSPSVWVVGLAYSPDGHTLATISGDRLV-----RFWD  
>A8L579  
IGRRAARPAGPPLAGHGGW----VLSADFS PDGMIMATSAKDGEV-----LLWD  
VAEPAAPRLVGRTPDGPDDG----VTSVVFSPDGHTLAGTSWDGSL-----RLWD  
VTRPGAPHLGLRPLRAHAGP----VRSAAFATDGRMLATGSDDRSV-----QLWD  
MADRGAPRPLGGPVTGATSF----VTSVAFAPDDHLLVAAGYDRDV-----LFWD  
ITNRRAPRRLAR-IVAGPTS----ALVAAFAPDGRTLATGGVDGVI-----RLWD  
VTVPDRPTALGRPLAGHDNR----VWALAFAPDGRTLASGGFDNVV-----RLWD  
TSDRTRARPRGRPLAGHADW----VMSVRFAPHGRILASTGKDQTI-----RLWS  
>A8LHK5  
-SRNVEVTTRVALTG-HERD----VTSAAFSPDGRLLATT SKDGT-----RLWD  
---TTTGRTVGRLSGRKISA----VHGCAFSPDGDLLATTGSDKTA-----RIWE  
---IATERLALTLAGHKGP----VYGCAFSPDGRLLATVSTDRTV-----KLWG  
---VSTGTNIATLTG-HRGS----VYGCAFSPDGRLLVTAGAEST-----LLWD  
---VTIGETITSLAG-HTNF----ANGCSFSPDGLLLATT SNDGT-----RLTD  
---TPTGTTTTLTPGS-----AQSCAFSPDGVLLATASTDDTA-----RLWD  
---VATGTAVATLTG-HSST----VMACAFAPYGLLLATTSTDKTA-----RLWD  
>A8L9U4  
-LRTSYSAATATVLTGHTGS----VLGLGISPDGRTIATSGADNVA-----RLWD  
VSDRTRPRQLSTIDAAGAW----VLDAAFSPDGKLLATVGYDRSA-----RLWD  
IGDRTRPKQLSSMLAHNGY----VLDAAFSPDGRMLATSGYDNTA-----RLWD  
ITDPRQPHELAVLDRHTSW----VNEVAFSPDGKLLATASADHTA-----RLWD  
IANPRQPRPLAA-ITHTDF----VWTVAFSPDGRRLATGAYDGLV-----KIWD

ITDPTRPGATASFRADEKW-----VFDVAYSPDGRTLATAGWDTSV-----HLWD  
>A8KX81  
LAREPGVRPLGRPLADQAGW----ALSTAFSPDGKVMASSSRKGGV-----WLWN  
LAVPEDPHPIGRPLTGHNTNR----VWSLAFSPDGGTLASSGFDNSV-----RLWD  
ITDSGASKPAGRALTDDSGP----IWSVAFSADGRTLASGSDDTTV-----RLWD  
MADPATPVRIDPALTGPRDG----VTSLAFSPDGSLLAGGSWDGSI-----WLWD  
MADRGAPKRLAQ-SLSTPAT----TYVAAFSPNGRLLATGSTDGLV-----RLWD  
MTNRARPWFQFVR-LSSDMEF----VTSVAFSADNRLLLVAAGFSRTI-----AIWD  
>A8L1R5  
GLFAADVDPVVAPLGSR-----VLSAALRPDGRLLAAGTEAGTI-----ELWD  
LTDLAHPVHAGTISGVGD-----WVYSVAFNPGGNLLAAGVGDGAV-----RLWN  
VTDPARAGALATIAFHRD----RVRSVAFAPDGGTLASGGDDGQV-----GLWA  
VTDPSHPQRRSATDGAVA----GIRSLAFSPRGLLALAGNDGSV-----RLWN  
VADPARPATSSTLRGTGR----TVQSVAFSADSSTLAAGGIDGSV-----HTWR  
VDGPGSVVDLSTPGGVGG----VTSVGFSPGAILVSASEDETV-----RLTD  
ISAPADPVLLTDLRGHTKA----VSAAMFVPGGRTVVSASGDGSV-----RLWT  
>A8L653  
VRDPAKPSRISDVPGPAGG-----TAELLFSPDGRTLALGGLNSPPEPAFQARVETWD  
VTDLSRPRRLASLIAHRSS-----VRDLTFSPDGRTLVSAA-ERSV-----KLWD  
VTDPRRLRLVSELPEFPGG-----VWEVRFSPDGRTLAAGGANPFA-----TLWD  
-VTRMDAPRQIADLPGHSAS----VTSVAFSPDGTQLATGSNDNTV-----RIWD  
VTEHDSPTLIEKLARSAGSEAG--IEEILYTRDGEKLVGVI FTVPA-----VVWD  
>A8L516  
ITDPRRPFMITAFEGPAGG-----VFSLRFSPDGRTLVLGGLGSSPAPAFSASLETWD  
VRDPRHPARLASTVAHRGS-----VRDIQFSEDGHVMASVA-DRTV-----QLWD  
VSDPRRIAARATLPDFPGA-----ALRAAFAPDGRTLAVGGGGPYA-----TLWN  
ITDPARPTRTASLPGHVSE-----VNTVTFSPDGRTLVTGSGDNSV-----RVWD  
VRRPSNPRLVERLSRSAGTNSG--IGTVAFSRDGSTLVGVVFTEPG-----ALWD

Single-motif proteins homologous to the *Frankia* series

| <u>Genbank ID</u> | <u>Length</u> | <u>Organism</u>                                            |
|-------------------|---------------|------------------------------------------------------------|
| 297156412         | 73            | Actinobacteria; <i>Streptomyces bingchenggensis</i> BCW-1  |
| 357265231         | 83            | Cyanobacteria; <i>Crocospaera watsonii</i> WH 0003         |
| 357265846         | 99            | Cyanobacteria; <i>Crocospaera watsonii</i> WH 0003         |
| 493214827         | 58            | Cyanobacteria; <i>Nodularia spumigena</i>                  |
| 497319093         | 71            | Cyanobacteria; <i>Synechocystis</i> sp. PCC 7509           |
| 499925710         | 68            | Actinobacteria; <i>Frankia alni</i>                        |
| 518321537         | 72            | Cyanobacteria; <i>Calothrix</i> sp. PCC 7103               |
| 518334279         | 105           | Cyanobacteria; <i>Pleurocapsa</i> sp. PCC 7319             |
| 605047033         | 147           | Cyanobacteria; <i>Richelia intracellularis</i>             |
| 651290729         | 77            | Actinobacteria; <i>Actinokineospora inagensis</i>          |
| 658299017         | 107           | Cyanobacteria; <i>Planktothrix agardhii</i> NIVA-CYA 126/8 |
| 664265184         | 79            | Actinobacteria; <i>Streptomyces</i> sp. NRRL S-337         |
| 737391083         | 98            | Cyanobacteria; <i>Dolichospermum circinale</i>             |
| 739354603         | 164           | Cyanobacteria; <i>Richelia intracellularis</i>             |
| 746136515         | 167           | Cyanobacteria; <i>Aphanizomenon flos-aquae</i>             |
| 750668271         | 67            | Cyanobacteria; <i>Prochloron didemni</i>                   |
| 750668722         | 67            | Cyanobacteria; <i>Prochloron didemni</i>                   |
| 752584810         | 84            | Actinobacteria; <i>Frankia</i> sp. EAN1pec                 |
| 752686059         | 66            | Chloroflexi; <i>Roseiflexus</i> sp. RS-1                   |
| 808671128         | 93            | Actinobacteria; <i>Mycobacterium conceptionense</i>        |
